# Supplementary material
Source: ML conference proceedings conference paper supplement (https://proceedings.mlr.press/v173/vargas-quiros22a.html)
Supplement: Supplementary file [file vargas-quiros22a-supp.pdf]

# Covfee: an extensible web framework for continuous-time annotation of human behavior

## Supplementary Material

Jose Vargas-Quiros  
Stephanie Tan  
Chirag Raman  
Laura Cabrera-Quiros  
Hayley Hung

J.D.VARGASQUIROS@TUDELFT.NL  
S.TAN-1@TUDELFT.NL  
C.A.RAMAN@TUDELFT.NL  
L.C.CABRERAQUIROS@TUDELFT.NL  
H.HUNG@TUDELFT.NL

### Appendix A. Covfee specification examples

Here we present an example of a Covfee specification file for reference purposes. Using Covfee as a requester involves writing such a specification file:

```
{
  "id": "1d_annot",
  "name": "Continuous annot sample",
  "email": "example@example.com",
  "hits": [
    {
      "id": "1d_annot",
      "name": "1D annotation sample",
      "repeat": 2,
      "tasks": [
        {
          "type": "ContinuousKeypointTask",
          "name": "Head",
          "media": {
            "type": "video",
            "url": "$$www$$/myvideo.mp4",
            "resolution": [1920, 1080],
            "fps": 25
          }
        }
      ]
    }
  ]
}
```

Note: the exact schema of the specification file may vary with new Covfee releases.

Figure 1 shows the output of validation the Covfee specification above, with a mistake in the name of the task (*ContinuousKeypoint* insted of *ContinuousKeypointTask*) to showcase the kind of error messages that Covfee returns to the user.

```

✓ 1 covfee project files found.
✓ Read covfee file annotation.covfee.json.
✗ Error validating project "Continuous annot sample" in annotation.covfee.json.

Error in project["hits"][0]["tasks"][0] for object:
{
  "type": "ContinuousKeypoint",
  "name": "Head",
  "media": {
    "type": "video",
    "url": "$$www$$/sign.mp4",
    "resolution": [
      1920,
      1080
    ],
    "fps": 25
  }
}
Error: Invalid value 'ContinuousKeypoint' for property 'type'. Please make sure you are using a supported value.

```

Figure 1: A validation error generated by Covfee indicates the location of the error within the specification and the reason for it being invalid.

## Appendix B. Covlee web application

| HIT                | Instances | Submitted  | Links                                | Edit              |
|--------------------|-----------|------------|--------------------------------------|-------------------|
| + G0_HIT1          | 7         |            | <a href="#">Download: JSON   CSV</a> | <a href="#">✎</a> |
| - G0_HIT2          | 5         |            | <a href="#">Download: JSON   CSV</a> | <a href="#">✎</a> |
| > b7cecd9f95d8f578 |           | tasks: 1   | <a href="#">Download: JSON   CSV</a> |                   |
| > 24c6a6a0243bf925 |           | tasks: 1   | <a href="#">Download: JSON   CSV</a> |                   |
| > ec302308ddc965b1 |           | tasks: 196 | <a href="#">Download: JSON   CSV</a> |                   |
| > 99c6253ffa80a325 |           | tasks: 196 | <a href="#">Download: JSON   CSV</a> |                   |
| > 1f2ad0a34ee75020 |           | tasks: 1   | <a href="#">Download: JSON   CSV</a> |                   |
| - G0_HIT3          | 5         |            | <a href="#">Download: JSON   CSV</a> | <a href="#">✎</a> |
| > 94096aca1555f70a |           | tasks: 1   | <a href="#">Download: JSON   CSV</a> |                   |
| > eda1bf4c0b1962f1 |           | tasks: 196 | <a href="#">Download: JSON   CSV</a> |                   |
| > 97136a9c51b81bbb |           | tasks: 196 | <a href="#">Download: JSON   CSV</a> |                   |
| > a28da98e7a35aaac |           | tasks: 196 | <a href="#">Download: JSON   CSV</a> |                   |
| > 2d0f7ebc4c29b478 |           | tasks: 196 | <a href="#">Download: JSON   CSV</a> |                   |
| + G1_HIT1          | 5         |            | <a href="#">Download: JSON   CSV</a> | <a href="#">✎</a> |
| + G1_HIT2          | 6         |            | <a href="#">Download: JSON   CSV</a> | <a href="#">✎</a> |
| + G1_HIT3          | 5         |            | <a href="#">Download: JSON   CSV</a> | <a href="#">✎</a> |
| + G2_HIT1          | 3         |            | <a href="#">Download: JSON   CSV</a> | <a href="#">✎</a> |
| + G2_HIT2          | 5         |            | <a href="#">Download: JSON   CSV</a> | <a href="#">✎</a> |
| + G2_HIT3          | 3         |            | <a href="#">Download: JSON   CSV</a> | <a href="#">✎</a> |
| + G3_HIT1          | 3         |            | <a href="#">Download: JSON   CSV</a> | <a href="#">✎</a> |
| + G3_HIT2          | 3         |            | <a href="#">Download: JSON   CSV</a> | <a href="#">✎</a> |
| + G3_HIT3          | 4         |            | <a href="#">Download: JSON   CSV</a> | <a href="#">✎</a> |
| + G4_HIT1          | 4         |            | <a href="#">Download: JSON   CSV</a> | <a href="#">✎</a> |

Figure 2: The admin panel allows for tracking of HITs, downloading results, and accessing URLs for dissemination.

Consent

automatically. Withdrawal after completion of the experiment is not possible as the data will be stored completely anonymously (i.e. we cannot link it back to your identity).

5. Funding for this project is provided by the Netherlands Organization for Scientific Research (NWO) under project number 639.022.606.

6. For issues, concerns or complaints please contact: The responsible researcher: Jose Vargas Quiros  
j.vargasquiros@tudelft.nl +31626520033

The institution of the researcher: Delft University of Technology info@tudelft.nl +3115 2789111

The funding source of this project: NWO The Hague nwo@nwo.nl +31 (0)70 3440640

I have read and understood the study information dated [DD/MM/YYYY], or it has been read to me. I have been able to ask questions about the study and my questions have been answered to my satisfaction.

Yes

No

I consent voluntarily to be a participant in this study and understand that I can refuse to answer questions and I can withdraw from the study at any time, without having to give a reason.

Yes

No

I understand that taking part in the study involves providing data ratings or annotations which will be recorded but not linked to my identity, along with data about my interaction with the web interface.

Yes

No

I understand that information I provide will be used for scientific publications.

Yes

No

I understand that personal information collected about me that can identify me, such as [e.g. my name or where I live], will not be asked nor stored.

Yes

No

I give permission for the annotations that I provide to be archived in networked storage at Delft University of Technology in anonymized form so it can be used for future research. I understand that data will not be made public but may be shared with researchers under an End User License Agreement (EULA).

Yes

No

[Next](#)

Figure 3: Consent forms can be specified directly in Covlee. They can act as a requirements before annotators get access to the data.

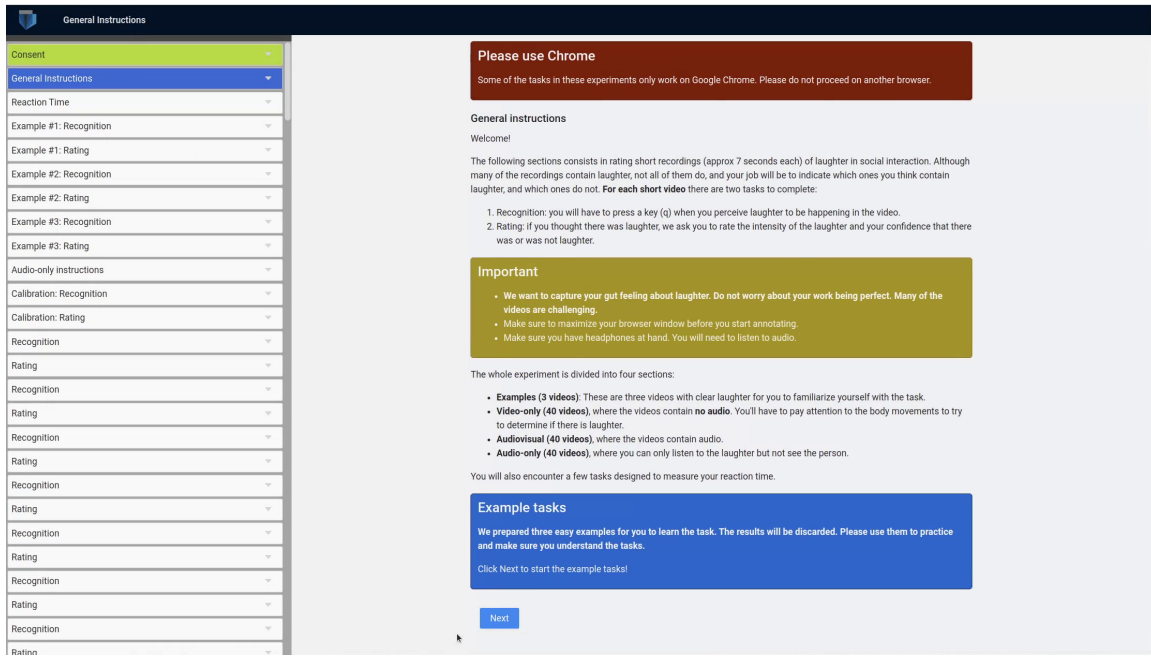

Figure 4: Rich instructions in Markdown / HTML format can be specified directly into a Covfee HIT. Providing good instructions is key for novel annotation techniques that annotators are unfamiliar with.
